# Supplementary material
Source: ML conference proceedings conference paper supplement (https://proceedings.neurips.cc/paper_files/paper/2010/hash/8c6744c9d42ec2cb9e8885b54ff744d0-Abstract.html)
Supplement: Supplementary file [file 8c6744c9d42ec2cb9e8885b54ff744d0-Supplemental.zip]

---

# A primal-dual algorithm for group $\ell_1$ regularization with overlapping groups

---

## Appendix

### Proof of Lemma 1

One of the advantages of Algorithm 2 for computing the projection  $\pi_{\tau K}$ , is the fact that the constraints that are already satisfied can be discarded. This follows from Lemma 1. To prove it we need an additional lemma.

**Lemma 2.** *Let  $\beta \in \mathbb{R}^d$ . Then  $|\pi_{\tau K}(\beta)|_i \leq |\beta|_i$  for all  $i = 1, \dots, d$ .*

**Proof.** Let  $C_r = \{\beta \in \mathbb{R}^d, \|\beta\|_{G_r} \leq 1\}$ , and define the sequence of projections  $\pi_n$  by setting  $\pi_n = \pi_{\tau C_n \bmod B}$ . Then, given a sequence  $\alpha_n \in (0, 1)$  converging to 0, denote by  $\beta_{n+1} = \alpha_n \beta + (1 - \alpha_n) \pi_n(\beta^n)$ , with  $\beta^0 := \beta$ .

By Theorem 3.1 in [4] it follows that for every  $\beta \in \mathbb{R}^d$

$$\pi_{\tau K}(\beta) = \lim_n \beta^n, \quad (1)$$

if  $\alpha_n$  goes to zero not too fast. We now prove by induction that (1) implies  $|(\beta^n)_j| \leq |\beta_j|$  for every  $n$  and for  $j = 1, \dots, d$ . First observe that, since we are projecting on a cylinder with radius  $\tau$  and centered on a coordinate axis (or coordinate subspace)

$$\begin{aligned} |\beta_j^1| &= |\alpha_1 \beta_j + (1 - \alpha_1)(\pi_{C_1}(\beta^0))_j| \\ &\leq \alpha_1 |\beta_j| + (1 - \alpha_1) |\beta_j| \\ &= |\beta_j|. \end{aligned}$$

Now suppose the inequality  $|(\beta^n)_j| \leq |\beta_j|$  to be satisfied. We have to prove the same for  $\beta^{n+1}$ . By definition

$$\begin{aligned} |\beta_j^{n+1}| &= |\alpha_n \beta_j + (1 - \alpha_n)(\pi_n(\beta^n))_j| \\ &\leq \alpha_n |\beta_j| + (1 - \alpha_n) |(\pi_n(\beta^n))_j| \\ &\leq |\beta_j|. \end{aligned}$$

Passing to the limit we finally get:

$$|(\pi_{\tau K}(\beta))_j| = \lim_n |(\beta^n)_j| \leq |\beta_j|.$$

If we denote  $K^{-s} = \bigcap_{r \neq s} C_r$ , the above Lemma guarantees in particular that if  $\pi_{\tau K^{-s}}(\beta) \in \tau K$  for all  $\beta \in \tau C_s$ , then  $\pi_{\tau K^{-s}}(\beta) = \pi_{\tau K}(\beta)$ . Lemma 1 then follows.

### Proof of Theorem 2

As usual, the Lagrangian function for the minimization problem (4) is defined as

$$\begin{aligned}
L(v, \lambda) &= \|v - \beta\|^2 + \sum_{r=1}^{\hat{B}} \lambda_r (\|v\|_{G_r}^2 - \tau^2) \\
&= \sum_{j=1}^d \left[ (v_j - \beta_j)^2 + \sum_{r=1}^{\hat{B}} \lambda_r \mathbf{1}_{r,j} v_j^2 \right] - \sum_{r=1}^{\hat{B}} \lambda_r \tau^2 \\
&= \sum_{j=1}^d \left( 1 + \sum_{r=1}^{\hat{B}} \mathbf{1}_{r,j} \lambda_r \right) \left( v_j - \frac{\beta_j}{1 + \sum_{r=1}^{\hat{B}} \mathbf{1}_{r,j} \lambda_r} \right)^2 - \sum_{j=1}^d \frac{\beta_j^2}{1 + \sum_{r=1}^{\hat{B}} \mathbf{1}_{r,j} \lambda_r} - \sum_{r=1}^{\hat{B}} \lambda_r \tau^2 + \|\beta\|^2
\end{aligned} \tag{2}$$

where  $\lambda \in \mathbb{R}^{\hat{B}}$ , and  $\mathbf{1}_{r,j}$  is 1 if  $j$  belongs to group  $G_r$  and 0 otherwise. The dual function is then

$$g(\lambda) = \inf_{v \in \mathbb{R}^d} L(v, \lambda) = L \left( \frac{\beta_j}{1 + \sum_{r=1}^{\hat{B}} \mathbf{1}_{r,j} \lambda_r}, \lambda \right) = - \sum_{j=1}^d \frac{\beta_j^2}{1 + \sum_{r=1}^{\hat{B}} \mathbf{1}_{r,j} \lambda_r} - \sum_{r=1}^{\hat{B}} \lambda_r \tau^2 + \|\beta\|^2.$$

Since strong duality holds, the minimum of (4) is equal to maximum of the dual problem which is therefore

$$\begin{aligned}
&\text{Maximize} && g(\lambda) \\
&\text{subject to} && \lambda_r \geq 0 \text{ for } r = 1, \dots, \hat{B}.
\end{aligned} \tag{3}$$

Once the solution  $\lambda^*$  to the dual problem (3) is obtained, the solution to the primal problem (4),  $v^*$ , is given by

$$v_j^* = \frac{\beta_j}{1 + \sum_{r=1}^{\hat{B}} \lambda_r^* \mathbf{1}_{r,j}} \quad \text{for } j = 1, \dots, d.$$

The dual problem (3) can thus be efficiently solved via Algorithm 2, where the first and second partial derivative of  $g(\lambda)$  are given by

$$\partial_r g(\lambda) = \tau^2 - \sum_{j=1}^d \beta_j^2 \frac{\mathbf{1}_{r,j}}{(1 + \sum_{s=1}^{\hat{B}} \mathbf{1}_{s,j} \lambda_s)^2},$$

and

$$\partial_r \partial_s g(\lambda) = \sum_{j=1}^d \frac{2\beta_j^2 \mathbf{1}_{r,j} \mathbf{1}_{s,j}}{(1 + \sum_{s=1}^{\hat{B}} \mathbf{1}_{s,j} \lambda_s)^3} = \begin{cases} 0 & \text{if } \hat{G}_r \cap \hat{G}_{r'} = \emptyset \\ 2 \sum_{j \in \hat{G}_{r,r'}} \beta_j^2 (1 + \sum_{s=1}^{\hat{B}} \mathbf{1}_{s,j} \lambda_s)^{-3} & \text{otherwise.} \end{cases}$$
